# Supplementary material
Source: publisher figshare collection journal article supplement (https://acs.figshare.com/ndownloader/files/4776247)
Supplement: Supplementary file 1 [file 4776247]

TITLE: Photophysical and theoretical studies on luminescent tetranuclear coinage metals building blocks.
AUTHORS: Eduardo J. Fern�ndez, Antonio Laguna, Jos� M. L�pez-de-Luzuriaga, Miguel Monge, Manuel Montiel, M. Elena Olmos and Mar�a Rodr�guez
JOURNAL: Organomeallics


data for complex 1 in the paper:
 
 
data_mm24 
 
_audit_creation_method            SHELXL-97 
_chemical_name_systematic 
; 
 ? 
; 
_chemical_name_common             ? 
_chemical_melting_point           ? 
_chemical_formula_moiety          ? 
_chemical_formula_sum 
 'C28 H6 Ag2 Au2 F20 N2' 
_chemical_formula_weight          1360.02
 
loop_ 
 _atom_type_symbol 
 _atom_type_description 
 _atom_type_scat_dispersion_real 
 _atom_type_scat_dispersion_imag 
 _atom_type_scat_source 
 'C'  'C'   0.0033   0.0016 
 'International Tables Vol C Tables 4.2.6.8 and 6.1.1.4' 
 'Ag'  'Ag'  -0.8971   1.1015 
 'International Tables Vol C Tables 4.2.6.8 and 6.1.1.4' 
 'Au'  'Au'  -2.0133   8.8022 
 'International Tables Vol C Tables 4.2.6.8 and 6.1.1.4' 
 'F'  'F'   0.0171   0.0103 
 'International Tables Vol C Tables 4.2.6.8 and 6.1.1.4' 
 'N'  'N'   0.0061   0.0033 
 'International Tables Vol C Tables 4.2.6.8 and 6.1.1.4' 
 'H'  'H'   0.0000   0.0000 
 'International Tables Vol C Tables 4.2.6.8 and 6.1.1.4' 
 
_symmetry_cell_setting            'Monoclinic'
_symmetry_space_group_name_H-M    'C2/c'
 
loop_ 
 _symmetry_equiv_pos_as_xyz 
 'x, y, z' 
 '-x, y, -z+1/2' 
 'x+1/2, y+1/2, z' 
 '-x+1/2, y+1/2, -z+1/2' 
 '-x, -y, -z' 
 'x, -y, z-1/2' 
 '-x+1/2, -y+1/2, -z' 
 'x+1/2, -y+1/2, z-1/2' 
 
_cell_length_a                    14.3431(3) 
_cell_length_b                    16.5223(4) 
_cell_length_c                    14.6397(3) 
_cell_angle_alpha                 90.00 
_cell_angle_beta                  111.6554(10) 
_cell_angle_gamma                 90.00 
_cell_volume                      3224.47(12) 
_cell_formula_units_Z             4 
_cell_measurement_temperature     173(2) 
_cell_measurement_reflns_used     3717 
_cell_measurement_theta_min       2.47
_cell_measurement_theta_max       27.89
 
_exptl_crystal_description        'prism'
_exptl_crystal_colour             'orange' 
_exptl_crystal_size_max           0.1 
_exptl_crystal_size_mid           0.1 
_exptl_crystal_size_min           0.06
_exptl_crystal_density_meas       ? 
_exptl_crystal_density_diffrn     2.802 
_exptl_crystal_density_method     'not measured' 
_exptl_crystal_F_000              2480 
_exptl_absorpt_coefficient_mu     10.410 
_exptl_absorpt_correction_type    'multiscan'
_exptl_absorpt_correction_T_min   ? 
_exptl_absorpt_correction_T_max   ? 
_exptl_absorpt_process_details    'Scalepack'
 
_exptl_special_details 
; 
'multi-scan from symmetry-related measurements'
; 
 
_diffrn_ambient_temperature       173(2) 
_diffrn_radiation_wavelength      0.71073 
_diffrn_radiation_type            MoK\a 
_diffrn_radiation_source          'fine-focus sealed tube' 
_diffrn_radiation_monochromator   graphite 
_diffrn_measurement_device_type   'Nonius KappaCCD'
_diffrn_measurement_method        '\f & \w-scan'
_diffrn_detector_area_resol_mean  9 
_diffrn_standards_number          ? 
_diffrn_standards_interval_count  ? 
_diffrn_standards_interval_time   ? 
_diffrn_standards_decay_%         ? 
_diffrn_reflns_number             13078
_diffrn_reflns_av_R_equivalents   0.051 
_diffrn_reflns_av_sigmaI/netI     0.0485 
_diffrn_reflns_limit_h_min        0 
_diffrn_reflns_limit_h_max        18 
_diffrn_reflns_limit_k_min        -20
_diffrn_reflns_limit_k_max        21 
_diffrn_reflns_limit_l_min        -19 
_diffrn_reflns_limit_l_max        17 
_diffrn_reflns_theta_min          1.5 
_diffrn_reflns_theta_max          27.89 
_reflns_number_total              3837 
_reflns_number_gt                 2948 
_reflns_threshold_expression      >2sigma(I) 
 
_computing_data_collection        'Nonius KappaCCD'
_computing_cell_refinement        'HKL and Scalepack (Otwinowski & Minor, 1997)'
_computing_data_reduction         'Denzo and Scalepack (Otwinowski & Minor, 1997)'
_computing_structure_solution     'SHELXS-97 (Sheldrick, 1990)' 
_computing_structure_refinement   'SHELXL-97 (Sheldrick, 1997)' 
_computing_molecular_graphics     'ORTEP-III for Windows'
_computing_publication_material   'SHELXL-97'
 
_refine_special_details 
; 
 Refinement of F^2^ against ALL reflections.  The weighted R-factor wR and 
 goodness of fit S are based on F^2^, conventional R-factors R are based 
 on F, with F set to zero for negative F^2^. The threshold expression of 
 F^2^ > 2sigma(F^2^) is used only for calculating R-factors(gt) etc. and is 
 not relevant to the choice of reflections for refinement.  R-factors based 
 on F^2^ are statistically about twice as large as those based on F, and R- 
 factors based on ALL data will be even larger. 
; 
 
_refine_ls_structure_factor_coef  Fsqd  
_refine_ls_matrix_type            full 
_refine_ls_weighting_scheme       calc  
_refine_ls_weighting_details 
 'calc w=1/[\s^2^(Fo^2^)+(0.0333P)^2^+12.5206P] where P=(Fo^2^+2Fc^2^)/3' 
_atom_sites_solution_primary      direct 
_atom_sites_solution_secondary    difmap 
_atom_sites_solution_hydrogens    geom 
_refine_ls_hydrogen_treatment     riding 
_refine_ls_extinction_method      none 
_refine_ls_extinction_coef        ? 
_refine_ls_number_reflns          3837 
_refine_ls_number_parameters      245 
_refine_ls_number_restraints      97 
_refine_ls_R_factor_all           0.0579 
_refine_ls_R_factor_gt            0.0361 
_refine_ls_wR_factor_ref          0.0781 
_refine_ls_wR_factor_gt           0.0715 
_refine_ls_goodness_of_fit_ref    1.033 
_refine_ls_restrained_S_all       1.022 
_refine_ls_shift/su_max           0.001 
_refine_ls_shift/su_mean          0.000 
 
loop_ 
 _atom_site_label 
 _atom_site_type_symbol 
 _atom_site_fract_x 
 _atom_site_fract_y 
 _atom_site_fract_z 
 _atom_site_U_iso_or_equiv 
 _atom_site_adp_type 
 _atom_site_occupancy 
 _atom_site_symmetry_multiplicity 
 _atom_site_calc_flag 
 _atom_site_refinement_flags 
 _atom_site_disorder_assembly 
 _atom_site_disorder_group 
Au Au 0.011714(19) 0.479403(14) 0.156429(17) 0.02994(9) Uani 1 1 d . . . 
Ag Ag 0.04585(4) 0.58598(3) 0.02717(4) 0.03965(15) Uani 1 1 d . . . 
C1 C 0.1526(5) 0.5299(3) 0.2080(4) 0.0307(13) Uani 1 1 d DU . . 
C2 C 0.1786(5) 0.6057(4) 0.2515(4) 0.0379(14) Uani 1 1 d DU . . 
C3 C 0.2745(5) 0.6331(4) 0.2930(5) 0.0494(17) Uani 1 1 d DU . . 
C4 C 0.3534(6) 0.5845(5) 0.2920(6) 0.059(2) Uani 1 1 d DU . . 
C5 C 0.3315(5) 0.5082(5) 0.2510(6) 0.0557(19) Uani 1 1 d DU . . 
C6 C 0.2346(5) 0.4832(4) 0.2097(5) 0.0396(15) Uani 1 1 d DU . . 
F1 F 0.1059(3) 0.6551(2) 0.2564(3) 0.0501(10) Uani 1 1 d DU . . 
F2 F 0.2951(4) 0.7066(3) 0.3343(3) 0.0715(14) Uani 1 1 d DU . . 
F3 F 0.4480(4) 0.6104(4) 0.3322(4) 0.0939(19) Uani 1 1 d DU . . 
F4 F 0.4073(4) 0.4599(4) 0.2535(5) 0.0929(19) Uani 1 1 d DU . . 
F5 F 0.2186(3) 0.4072(2) 0.1723(3) 0.0577(12) Uani 1 1 d DU . . 
C11 C -0.1309(5) 0.4279(3) 0.0942(4) 0.0346(14) Uani 1 1 d DU . . 
C12 C -0.1519(6) 0.3485(4) 0.1124(4) 0.0438(16) Uani 1 1 d DU . . 
C13 C -0.2482(6) 0.3218(4) 0.0921(5) 0.0541(18) Uani 1 1 d DU . . 
C14 C -0.3269(6) 0.3726(4) 0.0516(6) 0.060(2) Uani 1 1 d DU . . 
C15 C -0.3107(5) 0.4500(5) 0.0304(6) 0.0523(18) Uani 1 1 d DU . . 
C16 C -0.2135(5) 0.4762(4) 0.0519(5) 0.0394(15) Uani 1 1 d DU . . 
F6 F -0.0764(4) 0.2962(2) 0.1527(3) 0.0641(12) Uani 1 1 d DU . . 
F7 F -0.2646(4) 0.2439(3) 0.1117(4) 0.0789(16) Uani 1 1 d DU . . 
F8 F -0.4214(4) 0.3466(4) 0.0313(4) 0.0954(19) Uani 1 1 d DU . . 
F9 F -0.3893(4) 0.5012(3) -0.0104(4) 0.0779(15) Uani 1 1 d DU . . 
F10 F -0.2019(3) 0.5547(2) 0.0315(3) 0.0463(10) Uani 1 1 d DU . . 
N N -0.0359(5) 0.6945(3) 0.0441(5) 0.0466(15) Uani 1 1 d U . . 
C21 C -0.0741(6) 0.7461(4) 0.0662(5) 0.0434(17) Uani 1 1 d U . . 
C22 C -0.1222(7) 0.8130(5) 0.0963(8) 0.078(3) Uani 1 1 d U . . 
H22A H -0.1370 0.7972 0.1526 0.117 Uiso 1 1 calc R . . 
H22B H -0.1833 0.8271 0.0434 0.117 Uiso 1 1 calc R . . 
H22C H -0.0780 0.8589 0.1128 0.117 Uiso 1 1 calc R . . 
 
loop_ 
 _atom_site_aniso_label 
 _atom_site_aniso_U_11 
 _atom_site_aniso_U_22 
 _atom_site_aniso_U_33 
 _atom_site_aniso_U_23 
 _atom_site_aniso_U_13 
 _atom_site_aniso_U_12 
Au 0.03867(16) 0.03317(14) 0.02202(13) -0.00049(10) 0.01594(10) -0.00071(11) 
Ag 0.0663(4) 0.0321(3) 0.0284(3) -0.0030(2) 0.0266(3) -0.0031(2) 
C1 0.037(3) 0.039(3) 0.020(3) 0.004(2) 0.014(3) 0.002(3) 
C2 0.039(4) 0.043(3) 0.030(3) -0.004(3) 0.010(3) -0.002(3) 
C3 0.051(4) 0.060(4) 0.035(4) -0.011(3) 0.012(4) -0.014(3) 
C4 0.036(4) 0.087(5) 0.052(5) -0.010(4) 0.013(4) -0.014(4) 
C5 0.036(4) 0.083(5) 0.047(5) -0.008(4) 0.015(4) 0.007(3) 
C6 0.038(4) 0.051(4) 0.032(4) -0.002(3) 0.016(3) 0.007(3) 
F1 0.050(3) 0.048(2) 0.046(2) -0.0146(19) 0.011(2) 0.0036(19) 
F2 0.072(4) 0.070(3) 0.062(3) -0.026(3) 0.013(3) -0.025(2) 
F3 0.043(3) 0.133(5) 0.091(4) -0.029(4) 0.008(3) -0.024(3) 
F4 0.042(3) 0.123(5) 0.112(5) -0.030(4) 0.026(3) 0.021(3) 
F5 0.057(3) 0.055(2) 0.066(3) -0.015(2) 0.029(2) 0.010(2) 
C11 0.048(4) 0.035(3) 0.024(3) -0.006(2) 0.018(3) -0.012(3) 
C12 0.069(4) 0.036(3) 0.030(4) -0.002(3) 0.023(4) -0.011(3) 
C13 0.083(4) 0.043(4) 0.039(4) 0.000(3) 0.026(4) -0.031(3) 
C14 0.061(5) 0.069(4) 0.052(5) 0.003(4) 0.022(4) -0.030(4) 
C15 0.045(4) 0.062(4) 0.046(4) 0.003(4) 0.013(4) -0.014(3) 
C16 0.049(4) 0.043(3) 0.033(4) 0.000(3) 0.023(3) -0.010(3) 
F6 0.091(4) 0.041(2) 0.060(3) 0.011(2) 0.028(3) 0.003(2) 
F7 0.111(5) 0.056(3) 0.069(3) 0.006(2) 0.031(3) -0.039(3) 
F8 0.067(3) 0.110(4) 0.103(4) 0.013(4) 0.024(3) -0.050(3) 
F9 0.040(3) 0.091(3) 0.091(4) 0.014(3) 0.011(3) -0.005(2) 
F10 0.044(2) 0.040(2) 0.054(3) 0.0089(19) 0.017(2) -0.0021(18) 
N 0.061(4) 0.027(3) 0.057(4) 0.002(3) 0.028(3) 0.001(3) 
C21 0.049(5) 0.029(3) 0.054(5) 0.009(3) 0.020(4) 0.000(3) 
C22 0.096(8) 0.046(5) 0.114(8) 0.009(5) 0.066(7) 0.028(5) 
 
_geom_special_details 
; 
 All esds (except the esd in the dihedral angle between two l.s. planes) 
 are estimated using the full covariance matrix.  The cell esds are taken 
 into account individually in the estimation of esds in distances, angles 
 and torsion angles; correlations between esds in cell parameters are only 
 used when they are defined by crystal symmetry.  An approximate (isotropic) 
 treatment of cell esds is used for estimating esds involving l.s. planes. 
; 
 
loop_ 
 _geom_bond_atom_site_label_1 
 _geom_bond_atom_site_label_2 
 _geom_bond_distance 
 _geom_bond_site_symmetry_2 
 _geom_bond_publ_flag 
Au C1 2.055(6) . ? 
Au C11 2.088(6) . ? 
Au Ag 2.7267(5) 5_565 ? 
Au Ag 2.7577(5) . ? 
Au Au 2.8807(4) 2 ? 
Ag N 2.206(6) . ? 
Ag C11 2.508(6) 5_565 ? 
Ag C1 2.687(6) . ? 
Ag Au 2.7267(5) 5_565 ? 
Ag Ag 3.1084(10) 5_565 ? 
C1 C2 1.393(8) . ? 
C1 C6 1.398(8) . ? 
C2 F1 1.346(7) . ? 
C2 C3 1.361(9) . ? 
C3 F2 1.341(8) . ? 
C3 C4 1.391(9) . ? 
C4 F3 1.335(9) . ? 
C4 C5 1.383(10) . ? 
C5 F4 1.339(8) . ? 
C5 C6 1.358(9) . ? 
C6 F5 1.355(7) . ? 
C11 C16 1.372(8) . ? 
C11 C12 1.393(8) . ? 
C11 Ag 2.508(6) 5_565 ? 
C12 F6 1.341(8) . ? 
C12 C13 1.375(9) . ? 
C13 C14 1.355(10) . ? 
C13 F7 1.357(7) . ? 
C14 F8 1.346(9) . ? 
C14 C15 1.356(9) . ? 
C15 F9 1.359(9) . ? 
C15 C16 1.381(9) . ? 
C16 F10 1.355(7) . ? 
N C21 1.123(8) . ? 
C21 C22 1.455(10) . ? 
 
loop_ 
 _geom_angle_atom_site_label_1 
 _geom_angle_atom_site_label_2 
 _geom_angle_atom_site_label_3 
 _geom_angle 
 _geom_angle_site_symmetry_1 
 _geom_angle_site_symmetry_3 
 _geom_angle_publ_flag 
C1 Au C11 175.9(2) . . ? 
C1 Au Ag 114.93(14) . 5_565 ? 
C11 Au Ag 61.10(15) . 5_565 ? 
C1 Au Ag 66.00(15) . . ? 
C11 Au Ag 110.73(15) . . ? 
Ag Au Ag 69.048(17) 5_565 . ? 
C1 Au Au 95.45(14) . 2 ? 
C11 Au Au 88.63(15) . 2 ? 
Ag Au Au 146.964(15) 5_565 2 ? 
Ag Au Au 139.922(11) . 2 ? 
N Ag C11 124.8(2) . 5_565 ? 
N Ag C1 107.7(2) . . ? 
C11 Ag C1 114.63(19) 5_565 . ? 
N Ag Au 116.90(17) . 5_565 ? 
C11 Ag Au 46.79(14) 5_565 5_565 ? 
C1 Ag Au 133.59(11) . 5_565 ? 
N Ag Au 101.88(15) . . ? 
C11 Ag Au 133.11(13) 5_565 . ? 
C1 Ag Au 44.34(13) . . ? 
Au Ag Au 110.952(17) 5_565 . ? 
N Ag Ag 125.41(16) . 5_565 ? 
C11 Ag Ag 90.32(13) 5_565 5_565 ? 
C1 Ag Ag 88.30(13) . 5_565 ? 
Au Ag Ag 55.947(15) 5_565 5_565 ? 
Au Ag Ag 55.006(14) . 5_565 ? 
C2 C1 C6 114.0(6) . . ? 
C2 C1 Au 126.4(4) . . ? 
C6 C1 Au 119.3(4) . . ? 
C2 C1 Ag 95.7(3) . . ? 
C6 C1 Ag 112.2(4) . . ? 
Au C1 Ag 69.66(18) . . ? 
F1 C2 C3 116.8(6) . . ? 
F1 C2 C1 119.2(6) . . ? 
C3 C2 C1 123.9(6) . . ? 
F2 C3 C2 121.4(7) . . ? 
F2 C3 C4 118.9(6) . . ? 
C2 C3 C4 119.7(6) . . ? 
F3 C4 C5 121.0(7) . . ? 
F3 C4 C3 120.6(7) . . ? 
C5 C4 C3 118.4(7) . . ? 
F4 C5 C6 121.3(7) . . ? 
F4 C5 C4 118.6(7) . . ? 
C6 C5 C4 120.1(7) . . ? 
F5 C6 C5 117.0(6) . . ? 
F5 C6 C1 119.2(6) . . ? 
C5 C6 C1 123.8(6) . . ? 
C16 C11 C12 114.9(6) . . ? 
C16 C11 Au 120.2(4) . . ? 
C12 C11 Au 123.1(5) . . ? 
C16 C11 Ag 107.4(4) . 5_565 ? 
C12 C11 Ag 104.2(3) . 5_565 ? 
Au C11 Ag 72.11(18) . 5_565 ? 
F6 C12 C13 118.1(6) . . ? 
F6 C12 C11 119.6(6) . . ? 
C13 C12 C11 122.2(7) . . ? 
C14 C13 F7 119.9(7) . . ? 
C14 C13 C12 120.2(6) . . ? 
F7 C13 C12 119.9(7) . . ? 
F8 C14 C13 120.5(6) . . ? 
F8 C14 C15 119.5(7) . . ? 
C13 C14 C15 120.0(7) . . ? 
C14 C15 F9 120.2(7) . . ? 
C14 C15 C16 119.1(7) . . ? 
F9 C15 C16 120.6(6) . . ? 
F10 C16 C11 120.0(6) . . ? 
F10 C16 C15 116.4(6) . . ? 
C11 C16 C15 123.5(6) . . ? 
C21 N Ag 170.0(6) . . ? 
N C21 C22 179.1(10) . . ? 
 
_diffrn_measured_fraction_theta_max    0.995 
_diffrn_reflns_theta_full              27.89 
_diffrn_measured_fraction_theta_full   0.995 
_refine_diff_density_max    1.087 
_refine_diff_density_min   -1.430 
_refine_diff_density_rms    0.204 


#########################################################END of data for complex 1

data for complex 2 in the paper:
  
 
data_ele60s 
 
_audit_creation_method            SHELXL-97 
_chemical_name_systematic 
; 
 ? 
; 
_chemical_name_common             ? 
_chemical_melting_point           ? 
_chemical_formula_moiety          ? 
_chemical_formula_sum 
 'C28 H6 Au2 Cu2 F20 N2' 
_chemical_formula_weight          1271.36
 
loop_ 
 _atom_type_symbol 
 _atom_type_description 
 _atom_type_scat_dispersion_real 
 _atom_type_scat_dispersion_imag 
 _atom_type_scat_source 
 'C'  'C'   0.0033   0.0016 
 'International Tables Vol C Tables 4.2.6.8 and 6.1.1.4' 
 'H'  'H'   0.0000   0.0000 
 'International Tables Vol C Tables 4.2.6.8 and 6.1.1.4' 
 'Au'  'Au'  -2.0133   8.8022 
 'International Tables Vol C Tables 4.2.6.8 and 6.1.1.4' 
 'Cu'  'Cu'   0.3201   1.2651 
 'International Tables Vol C Tables 4.2.6.8 and 6.1.1.4' 
 'F'  'F'   0.0171   0.0103 
 'International Tables Vol C Tables 4.2.6.8 and 6.1.1.4' 
 'N'  'N'   0.0061   0.0033 
 'International Tables Vol C Tables 4.2.6.8 and 6.1.1.4' 
 
_symmetry_cell_setting            'Monoclinic'
_symmetry_space_group_name_H-M    'C2/c'
 
loop_ 
 _symmetry_equiv_pos_as_xyz 
 'x, y, z' 
 '-x, y, -z+1/2' 
 'x+1/2, y+1/2, z' 
 '-x+1/2, y+1/2, -z+1/2' 
 '-x, -y, -z' 
 'x, -y, z-1/2' 
 '-x+1/2, -y+1/2, -z' 
 'x+1/2, -y+1/2, z-1/2' 
 
_cell_length_a                    14.0107(2) 
_cell_length_b                    16.4487(4) 
_cell_length_c                    14.0295(3) 
_cell_angle_alpha                 90.00 
_cell_angle_beta                  106.1191(13) 
_cell_angle_gamma                 90.00 
_cell_volume                      3106.10(11) 
_cell_formula_units_Z             4 
_cell_measurement_temperature     173(2) 
_cell_measurement_reflns_used     20140
_cell_measurement_theta_min       2.72 
_cell_measurement_theta_max       27.88 
 
_exptl_crystal_description        'prism'
_exptl_crystal_colour             'orange
_exptl_crystal_size_max           0.15 
_exptl_crystal_size_mid           0.05 
_exptl_crystal_size_min           0.05 
_exptl_crystal_density_meas       ? 
_exptl_crystal_density_diffrn     2.719 
_exptl_crystal_density_method     'not measured' 
_exptl_crystal_F_000              2336 
_exptl_absorpt_coefficient_mu     10.915 
_exptl_absorpt_correction_type    'multiscan'
_exptl_absorpt_correction_T_min   0.2913 
_exptl_absorpt_correction_T_max   0.6114 
_exptl_absorpt_process_details    'Sortav Blessing (1995)'
 
_exptl_special_details 
; 
 'multi-scan from symmetry-related measurement (Blessing, 1995)'
; 
 
_diffrn_ambient_temperature       173(2) 
_diffrn_radiation_wavelength      0.71073 
_diffrn_radiation_type            MoK\a 
_diffrn_radiation_source          'fine-focus sealed tube' 
_diffrn_radiation_monochromator   graphite 
_diffrn_measurement_device_type   'Nonius KappaCCD'
_diffrn_measurement_method        '\w- and \f-scan'
_diffrn_detector_area_resol_mean  9 
_diffrn_standards_number          ? 
_diffrn_standards_interval_count  ? 
_diffrn_standards_interval_time   ? 
_diffrn_standards_decay_%         ? 
_diffrn_reflns_number             24691 
_diffrn_reflns_av_R_equivalents   0.0729 
_diffrn_reflns_av_sigmaI/netI     0.0451 
_diffrn_reflns_limit_h_min        -18 
_diffrn_reflns_limit_h_max        16 
_diffrn_reflns_limit_k_min        -21 
_diffrn_reflns_limit_k_max        21 
_diffrn_reflns_limit_l_min        -18 
_diffrn_reflns_limit_l_max        18 
_diffrn_reflns_theta_min          0.21 
_diffrn_reflns_theta_max          27.88 
_reflns_number_total              3704 
_reflns_number_gt                 2827 
_reflns_threshold_expression      >2sigma(I) 
 
_computing_data_collection        'Nonius KappaCCD'
_computing_cell_refinement        'HKL and Scalepack (Otwinowski & Minor, 1997)'
_computing_data_reduction         'Denzo and Scalepack (Otwinowski & Minor, 1997)' 
_computing_structure_solution     'SHELXS-97 (Sheldrick, 1990)' 
_computing_structure_refinement   'SHELXL-97 (Sheldrick, 1997)' 
_computing_molecular_graphics     'ORTEP-III for Windows'
_computing_publication_material   'SHELXL-97'
 
_refine_special_details 
; 
 Refinement of F^2^ against ALL reflections.  The weighted R-factor wR and 
 goodness of fit S are based on F^2^, conventional R-factors R are based 
 on F, with F set to zero for negative F^2^. The threshold expression of 
 F^2^ > 2sigma(F^2^) is used only for calculating R-factors(gt) etc. and is 
 not relevant to the choice of reflections for refinement.  R-factors based 
 on F^2^ are statistically about twice as large as those based on F, and R- 
 factors based on ALL data will be even larger. 
; 
 
_refine_ls_structure_factor_coef  Fsqd  
_refine_ls_matrix_type            full 
_refine_ls_weighting_scheme       calc  
_refine_ls_weighting_details 
 'calc w=1/[\s^2^(Fo^2^)+(0.0247P)^2^+0.0000P] where P=(Fo^2^+2Fc^2^)/3' 
_atom_sites_solution_primary      direct 
_atom_sites_solution_secondary    difmap 
_atom_sites_solution_hydrogens    geom 
_refine_ls_hydrogen_treatment     riding 
_refine_ls_extinction_method      none 
_refine_ls_extinction_coef        ? 
_refine_ls_number_reflns          3704 
_refine_ls_number_parameters      245 
_refine_ls_number_restraints      97 
_refine_ls_R_factor_all           0.0511 
_refine_ls_R_factor_gt            0.0289 
_refine_ls_wR_factor_ref          0.0578 
_refine_ls_wR_factor_gt           0.0533 
_refine_ls_goodness_of_fit_ref    1.034 
_refine_ls_restrained_S_all       1.023 
_refine_ls_shift/su_max           0.008 
_refine_ls_shift/su_mean          0.000 
 
loop_ 
 _atom_site_label 
 _atom_site_type_symbol 
 _atom_site_fract_x 
 _atom_site_fract_y 
 _atom_site_fract_z 
 _atom_site_U_iso_or_equiv 
 _atom_site_adp_type 
 _atom_site_occupancy 
 _atom_site_symmetry_multiplicity 
 _atom_site_calc_flag 
 _atom_site_refinement_flags 
 _atom_site_disorder_assembly 
 _atom_site_disorder_group 
Au Au 0.516556(13) 0.485782(10) 0.151999(12) 0.02889(7) Uani 1 1 d . . . 
Cu Cu 0.53910(5) 0.58584(3) 0.01758(4) 0.03933(15) Uani 1 1 d . . . 
C1 C 0.6562(3) 0.5320(3) 0.2084(3) 0.0317(10) Uani 1 1 d DU . . 
C2 C 0.6812(3) 0.6086(3) 0.2488(3) 0.0323(10) Uani 1 1 d DU . . 
C3 C 0.7768(4) 0.6345(3) 0.2931(3) 0.0443(12) Uani 1 1 d DU . . 
C4 C 0.8539(4) 0.5811(3) 0.2976(4) 0.0500(13) Uani 1 1 d DU . . 
C5 C 0.8338(4) 0.5043(3) 0.2598(4) 0.0485(13) Uani 1 1 d DU . . 
C6 C 0.7377(4) 0.4817(3) 0.2162(3) 0.0374(11) Uani 1 1 d DU . . 
F1 F 0.60766(19) 0.66249(16) 0.24977(18) 0.0448(7) Uani 1 1 d DU . . 
F2 F 0.7952(2) 0.70870(19) 0.3323(2) 0.0635(9) Uani 1 1 d DU . . 
F3 F 0.9479(2) 0.6044(2) 0.3401(2) 0.0805(11) Uani 1 1 d DU . . 
F4 F 0.9092(2) 0.4515(2) 0.2685(3) 0.0762(10) Uani 1 1 d DU . . 
F5 F 0.7232(2) 0.40381(17) 0.1836(2) 0.0502(7) Uani 1 1 d DU . . 
C11 C 0.3777(3) 0.4334(2) 0.0875(3) 0.0301(10) Uani 1 1 d DU . . 
C12 C 0.3553(3) 0.3546(3) 0.1101(3) 0.0346(10) Uani 1 1 d DU . . 
C13 C 0.2609(4) 0.3248(3) 0.0907(3) 0.0420(12) Uani 1 1 d DU . . 
C14 C 0.1827(4) 0.3731(3) 0.0457(3) 0.0454(12) Uani 1 1 d DU . . 
C15 C 0.1984(3) 0.4517(3) 0.0208(3) 0.0399(11) Uani 1 1 d DU . . 
C16 C 0.2942(3) 0.4799(2) 0.0432(3) 0.0294(10) Uani 1 1 d DU . . 
F6 F 0.4298(2) 0.30364(16) 0.1552(2) 0.0495(7) Uani 1 1 d DU . . 
F7 F 0.2432(2) 0.24759(16) 0.1138(2) 0.0614(9) Uani 1 1 d DU . . 
F8 F 0.0888(2) 0.3453(2) 0.0253(2) 0.0735(10) Uani 1 1 d DU . . 
F9 F 0.1216(2) 0.50039(17) -0.0224(3) 0.0611(9) Uani 1 1 d DU . . 
F10 F 0.30639(19) 0.55907(15) 0.02071(18) 0.0390(6) Uani 1 1 d DU . . 
N N 0.4763(3) 0.6826(2) 0.0437(3) 0.0356(9) Uani 1 1 d U . . 
C21 C 0.4367(4) 0.7380(3) 0.0626(3) 0.0360(11) Uani 1 1 d U . . 
C22 C 0.3883(4) 0.8098(3) 0.0898(4) 0.0590(16) Uani 1 1 d U . . 
H22A H 0.3573 0.7954 0.1421 0.089 Uiso 1 1 calc R . . 
H22B H 0.3373 0.8296 0.0315 0.089 Uiso 1 1 calc R . . 
H22C H 0.4378 0.8525 0.1140 0.089 Uiso 1 1 calc R . . 
 
loop_ 
 _atom_site_aniso_label 
 _atom_site_aniso_U_11 
 _atom_site_aniso_U_22 
 _atom_site_aniso_U_33 
 _atom_site_aniso_U_23 
 _atom_site_aniso_U_13 
 _atom_site_aniso_U_12 
Au 0.03698(12) 0.02604(10) 0.02646(10) 0.00059(7) 0.01347(8) -0.00049(8) 
Cu 0.0641(4) 0.0276(3) 0.0353(3) -0.0044(2) 0.0288(3) -0.0029(3) 
C1 0.041(3) 0.035(3) 0.024(2) 0.0041(18) 0.016(2) -0.002(2) 
C2 0.039(3) 0.035(3) 0.023(2) 0.0046(19) 0.008(2) 0.002(2) 
C3 0.048(3) 0.048(3) 0.033(3) -0.004(2) 0.005(2) -0.011(2) 
C4 0.034(3) 0.068(4) 0.041(3) 0.000(3) 0.000(2) -0.003(2) 
C5 0.046(3) 0.058(4) 0.043(3) 0.003(2) 0.015(3) 0.010(2) 
C6 0.043(3) 0.039(3) 0.034(3) 0.002(2) 0.017(2) 0.003(2) 
F1 0.0500(18) 0.0382(17) 0.0427(15) -0.0086(13) 0.0068(13) 0.0047(13) 
F2 0.064(2) 0.059(2) 0.0562(19) -0.0129(16) -0.0026(16) -0.0178(17) 
F3 0.0366(18) 0.114(3) 0.077(2) -0.008(2) -0.0070(16) -0.0106(19) 
F4 0.045(2) 0.096(3) 0.083(2) -0.009(2) 0.0103(18) 0.0316(19) 
F5 0.058(2) 0.0411(18) 0.0555(17) -0.0039(14) 0.0229(15) 0.0144(14) 
C11 0.038(3) 0.029(2) 0.025(2) -0.0037(18) 0.012(2) -0.0043(19) 
C12 0.050(3) 0.028(3) 0.027(2) 0.0036(19) 0.013(2) -0.003(2) 
C13 0.071(3) 0.026(2) 0.031(3) 0.000(2) 0.018(2) -0.018(2) 
C14 0.046(3) 0.047(3) 0.042(3) 0.001(2) 0.009(2) -0.021(2) 
C15 0.035(3) 0.045(3) 0.036(3) 0.003(2) 0.003(2) -0.005(2) 
C16 0.041(3) 0.022(2) 0.026(2) -0.0010(18) 0.010(2) -0.0065(19) 
F6 0.064(2) 0.0320(16) 0.0520(17) 0.0108(13) 0.0143(15) 0.0060(14) 
F7 0.097(3) 0.0325(17) 0.0550(19) 0.0048(14) 0.0216(19) -0.0270(16) 
F8 0.058(2) 0.068(2) 0.085(2) 0.0136(19) 0.0041(18) -0.0356(17) 
F9 0.0381(18) 0.055(2) 0.079(2) 0.0149(16) -0.0018(17) -0.0027(14) 
F10 0.0418(16) 0.0277(15) 0.0451(15) 0.0055(12) 0.0080(13) -0.0042(12) 
N 0.044(3) 0.028(2) 0.035(2) -0.0050(17) 0.0100(19) -0.0085(18) 
C21 0.041(3) 0.030(3) 0.036(3) 0.002(2) 0.010(2) -0.007(2) 
C22 0.063(4) 0.038(3) 0.083(4) 0.004(3) 0.032(3) 0.010(3) 
 
_geom_special_details 
; 
 All esds (except the esd in the dihedral angle between two l.s. planes) 
 are estimated using the full covariance matrix.  The cell esds are taken 
 into account individually in the estimation of esds in distances, angles 
 and torsion angles; correlations between esds in cell parameters are only 
 used when they are defined by crystal symmetry.  An approximate (isotropic) 
 treatment of cell esds is used for estimating esds involving l.s. planes. 
; 
 
loop_ 
 _geom_bond_atom_site_label_1 
 _geom_bond_atom_site_label_2 
 _geom_bond_distance 
 _geom_bond_site_symmetry_2 
 _geom_bond_publ_flag 
Au C1 2.043(5) . ? 
Au C11 2.090(4) . ? 
Au Cu 2.5741(6) 5_665 ? 
Au Cu 2.5876(5) . ? 
Au Au 2.9129(3) 2_655 ? 
Cu N 1.903(4) . ? 
Cu C11 2.141(4) 5_665 ? 
Cu Au 2.5741(6) 5_665 ? 
Cu Cu 3.0197(11) 5_665 ? 
C1 C2 1.385(6) . ? 
C1 C6 1.390(6) . ? 
C2 F1 1.363(5) . ? 
C2 C3 1.378(6) . ? 
C3 F2 1.334(5) . ? 
C3 C4 1.381(6) . ? 
C4 F3 1.340(6) . ? 
C4 C5 1.369(6) . ? 
C5 F4 1.348(6) . ? 
C5 C6 1.366(7) . ? 
C6 F5 1.356(5) . ? 
C11 C16 1.392(6) . ? 
C11 C12 1.391(6) . ? 
C11 Cu 2.141(4) 5_665 ? 
C12 F6 1.351(5) . ? 
C12 C13 1.364(6) . ? 
C13 F7 1.351(5) . ? 
C13 C14 1.359(6) . ? 
C14 F8 1.347(5) . ? 
C14 C15 1.373(6) . ? 
C15 F9 1.343(5) . ? 
C15 C16 1.371(6) . ? 
C16 F10 1.362(4) . ? 
N C21 1.136(5) . ? 
C21 C22 1.464(6) . ? 
 
loop_ 
 _geom_angle_atom_site_label_1 
 _geom_angle_atom_site_label_2 
 _geom_angle_atom_site_label_3 
 _geom_angle 
 _geom_angle_site_symmetry_1 
 _geom_angle_site_symmetry_3 
 _geom_angle_publ_flag 
C1 Au C11 175.92(15) . . ? 
C1 Au Cu 122.71(11) . 5_665 ? 
C11 Au Cu 53.43(10) . 5_665 ? 
C1 Au Cu 75.40(11) . . ? 
C11 Au Cu 103.51(11) . . ? 
Cu Au Cu 71.61(2) 5_665 . ? 
C1 Au Au 91.18(10) . 2_655 ? 
C11 Au Au 92.06(10) . 2_655 ? 
Cu Au Au 141.788(14) 5_665 2_655 ? 
Cu Au Au 140.501(12) . 2_655 ? 
N Cu C11 128.73(15) . 5_665 ? 
N Cu Au 121.56(11) . 5_665 ? 
C11 Cu Au 51.63(11) 5_665 5_665 ? 
N Cu Au 103.59(11) . . ? 
C11 Cu Au 127.40(11) 5_665 . ? 
Au Cu Au 108.39(2) 5_665 . ? 
N Cu Cu 130.36(11) . 5_665 ? 
C11 Cu Cu 89.51(11) 5_665 5_665 ? 
Au Cu Cu 54.404(17) 5_665 5_665 ? 
Au Cu Cu 53.988(16) . 5_665 ? 
C2 C1 C6 113.6(4) . . ? 
C2 C1 Au 127.1(3) . . ? 
C6 C1 Au 119.1(3) . . ? 
F1 C2 C3 115.9(4) . . ? 
F1 C2 C1 119.3(4) . . ? 
C3 C2 C1 124.7(4) . . ? 
F2 C3 C2 121.4(5) . . ? 
F2 C3 C4 120.2(5) . . ? 
C2 C3 C4 118.3(5) . . ? 
F3 C4 C5 120.5(5) . . ? 
F3 C4 C3 119.9(5) . . ? 
C5 C4 C3 119.6(5) . . ? 
F4 C5 C6 121.0(5) . . ? 
F4 C5 C4 119.2(5) . . ? 
C6 C5 C4 119.8(5) . . ? 
F5 C6 C5 116.4(4) . . ? 
F5 C6 C1 119.6(4) . . ? 
C5 C6 C1 123.9(5) . . ? 
C16 C11 C12 113.5(4) . . ? 
C16 C11 Au 122.2(3) . . ? 
C12 C11 Au 121.8(3) . . ? 
C16 C11 Cu 109.0(3) . 5_665 ? 
C12 C11 Cu 102.7(3) . 5_665 ? 
Au C11 Cu 74.93(14) . 5_665 ? 
F6 C12 C13 116.8(4) . . ? 
F6 C12 C11 119.4(4) . . ? 
C13 C12 C11 123.8(4) . . ? 
F7 C13 C14 118.9(4) . . ? 
F7 C13 C12 121.5(5) . . ? 
C14 C13 C12 119.6(4) . . ? 
F8 C14 C13 121.0(4) . . ? 
F8 C14 C15 118.8(4) . . ? 
C13 C14 C15 120.2(5) . . ? 
F9 C15 C14 120.8(4) . . ? 
F9 C15 C16 120.8(4) . . ? 
C14 C15 C16 118.4(4) . . ? 
F10 C16 C15 116.6(4) . . ? 
F10 C16 C11 119.0(4) . . ? 
C15 C16 C11 124.4(4) . . ? 
C21 N Cu 176.3(4) . . ? 
N C21 C22 178.1(6) . . ? 
 
_diffrn_measured_fraction_theta_max    0.996 
_diffrn_reflns_theta_full              27.88 
_diffrn_measured_fraction_theta_full   0.996 
_refine_diff_density_max    0.793 
_refine_diff_density_min   -0.742 
_refine_diff_density_rms    0.140 

                                                                                                                      
#########################################################END of data for complex 2
